# Supplementary material for: Innova 2020: A Follow-Up Study of the Fecal Microbiota of Infants Using a Novel Infant Formula between 6 Months and 12 Months of Age
Source: MDPI journal article supplement (doi:10.3390/ijms24087392), 2023-04-17

# Innova 2020: A Follow-Up Study of the Fecal Microbiota of Infants Using a Novel Infant Formula between 6 Months and 12 Months of Age

Julio Plaza-Diaz <sup>1,2,3,\*†</sup>, Francisco Javier Ruiz-Ojeda <sup>1,2,4,5,†</sup>, Javier Morales <sup>6</sup>, Rafael Martín-Masot <sup>5,7</sup>, Eric Climent <sup>8</sup>, Ángela Silva <sup>8</sup>, Juan F. Martinez-Blanch <sup>8</sup>, María Enrique <sup>8</sup>, Marta Tortajada <sup>8</sup>, Daniel Ramon <sup>8</sup>, Beatriz Alvarez <sup>8</sup>, Empar Chenoll <sup>8</sup> and Ángel Gil <sup>1,2,4,9,\*</sup>

<sup>1</sup> Department of Biochemistry and Molecular Biology II, School of Pharmacy, University of Granada, 18071 Granada, Spain

<sup>2</sup> Instituto de Investigación Biosanitaria IBS.GRANADA, Complejo Hospitalario Universitario de Granada, 18014 Granada, Spain

<sup>3</sup> Children's Hospital of Eastern Ontario Research Institute, Ottawa, ON K1H 8L1, Canada

<sup>4</sup> RG Adipocytes and Metabolism, Institute for Diabetes and Obesity, Helmholtz Diabetes Center at Helmholtz Center Munich, Neuherberg, 85764 Munich, Germany

<sup>5</sup> Institute of Nutrition and Food Technology "José Mataix", Centre of Biomedical Research, University of Granada, Avda. del Conocimiento s/n. Armilla, 18016 Granada, Spain

<sup>6</sup> Product Development Department, Alter Farmacia SA, 28880 Madrid, Spain

<sup>7</sup> Pediatric Gastroenterology and Nutrition Unit, Hospital Regional Universitario de Málaga, 29010 Málaga, Spain

<sup>8</sup> ADM-BIOPOLIS, Scientific Park Universitat de València, 46980 València, Spain

<sup>9</sup> CIBEROBN (CIBER Physiopathology of Obesity and Nutrition), Instituto de Salud Carlos III, 28029 Madrid, Spain

\* Correspondence: jrplaza@ugr.es (J.P.-D.); agil@ugr.es (Á.G.); Tel.: +34-695466922 (A.G.)

† These authors contributed equally to this work.

**Supplementary Table S1.** Nutritional composition of the standard infant formula (STD) and study formula (INN).

| Composition                             | STD formula           |        |          | INN formula           |        |          |
|-----------------------------------------|-----------------------|--------|----------|-----------------------|--------|----------|
|                                         | 100 g                 | 100 mL | 100 kcal | 100 g                 | 100 mL | 100 kcal |
| Energy                                  | 514                   | 67     |          | 489                   | 67     |          |
| Energy                                  | 2152                  | 280    |          | 2046                  | 279    |          |
| Total Fat                               | 27                    | 3.5    | 5.2      | 25.6                  | 3.5    | 5.2      |
| Linoleic acid ( $\omega$ -6)            | 3.79                  | 493    | 736      | 3.147                 | 427    | 641      |
| $\alpha$ -linolenic acid ( $\omega$ -3) | 500                   | 65     | 97       | 387                   | 53     | 79       |
| Araquidonic acid AA ( $\omega$ -6)      | 53                    | 6.9    | 10       | 118                   | 16     | 24       |
| Docosahexaenoic acid DHA ( $\omega$ -3) | 53                    | 6.9    | 10       | 118                   | 16     | 24       |
| Carbohydrates                           | 56.4                  | 7.3    | 11       | 54.6                  | 7.4    | 11.1     |
| Total sugars                            | 56.4                  | 7.3    | 11       | 53                    | 7.2    | 10.8     |
| Lactose                                 | 55                    | 7.2    | 10.7     | 53                    | 7.2    | 10.8     |
| Fiber                                   | 1.3                   | 0.18   | 0.22     | 1.7                   | 0.22   | 0.33     |
| Proteins                                | 10.6                  | 1.4    | 2.1      | 9.4                   | 1.3    | 1.9      |
| Whey proteins                           | 6.4                   | 0.83   | 1.2      | 6.6                   | 0.9    | 1.3      |
| Caseins                                 | 4.2                   | 0.55   | 0.82     | 2.8                   | 0.38   | 0.57     |
| $\alpha$ -casein                        | 20 % of total protein |        |          | 8% of total protein   |        |          |
| $\beta$ -casein                         | 14 % of total protein |        |          | 18 % of total protein |        |          |

**Supplementary Figure S1.** Correlations between bacterial diversity indices, bacterial variables, SCFAs levels, metabolic traits and clinical outcomes A. Breastfed group, B. Standard formula group, C. Innova formula group

**A**

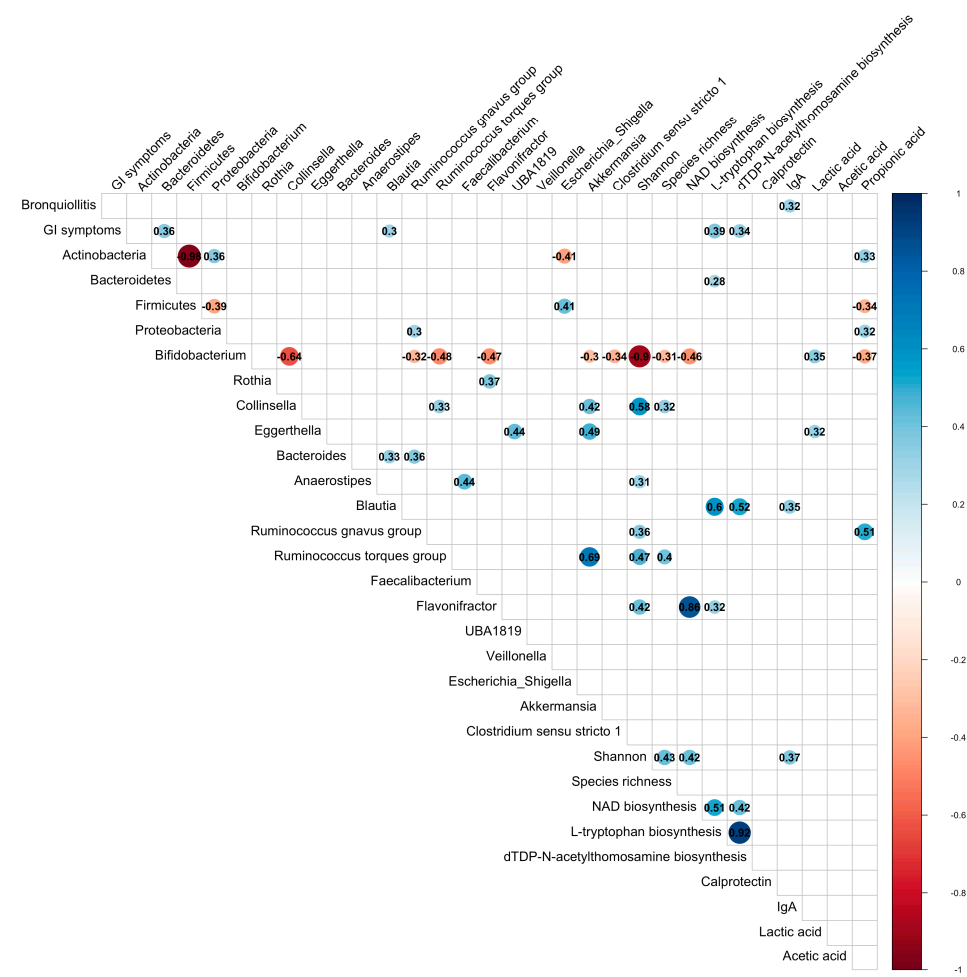

B

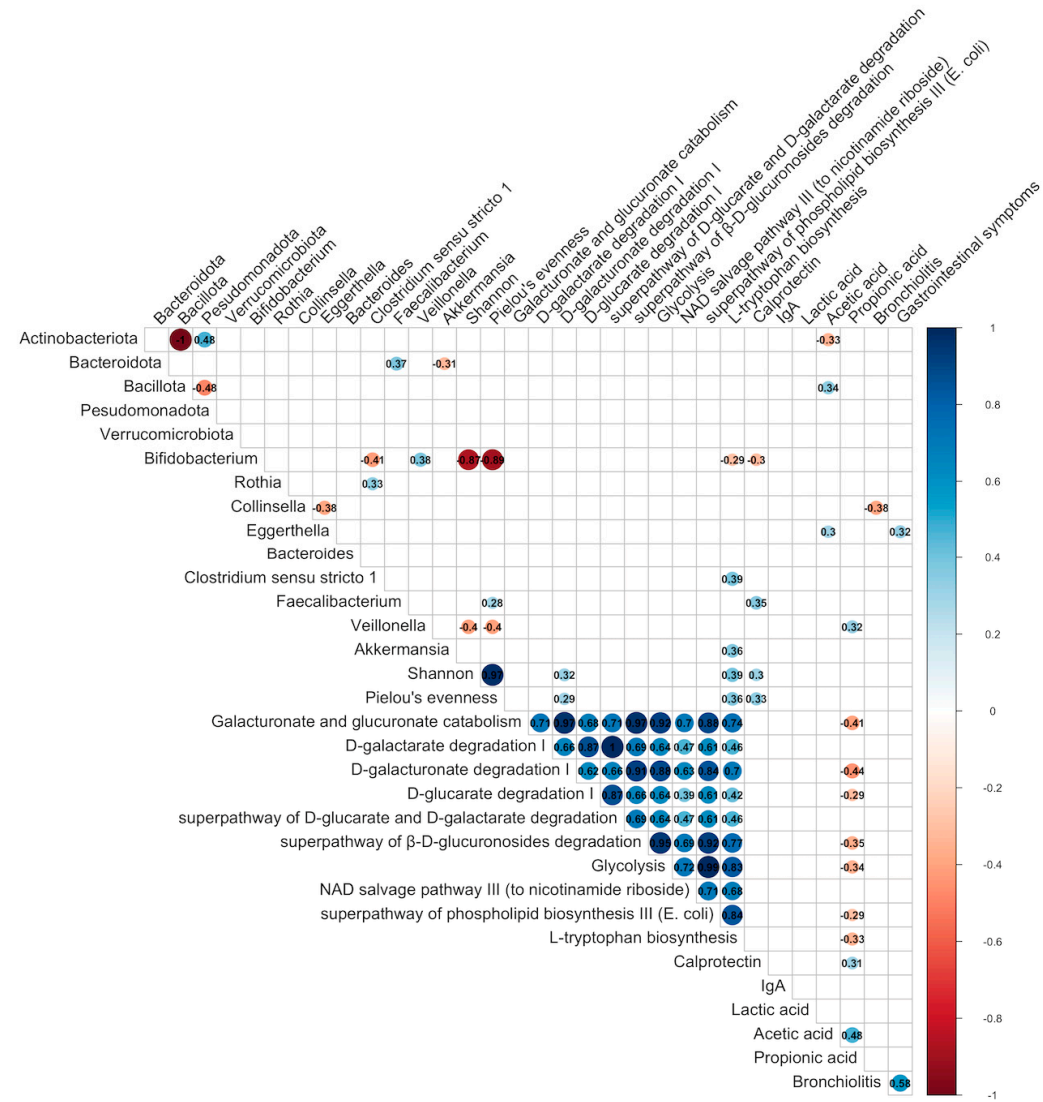

C

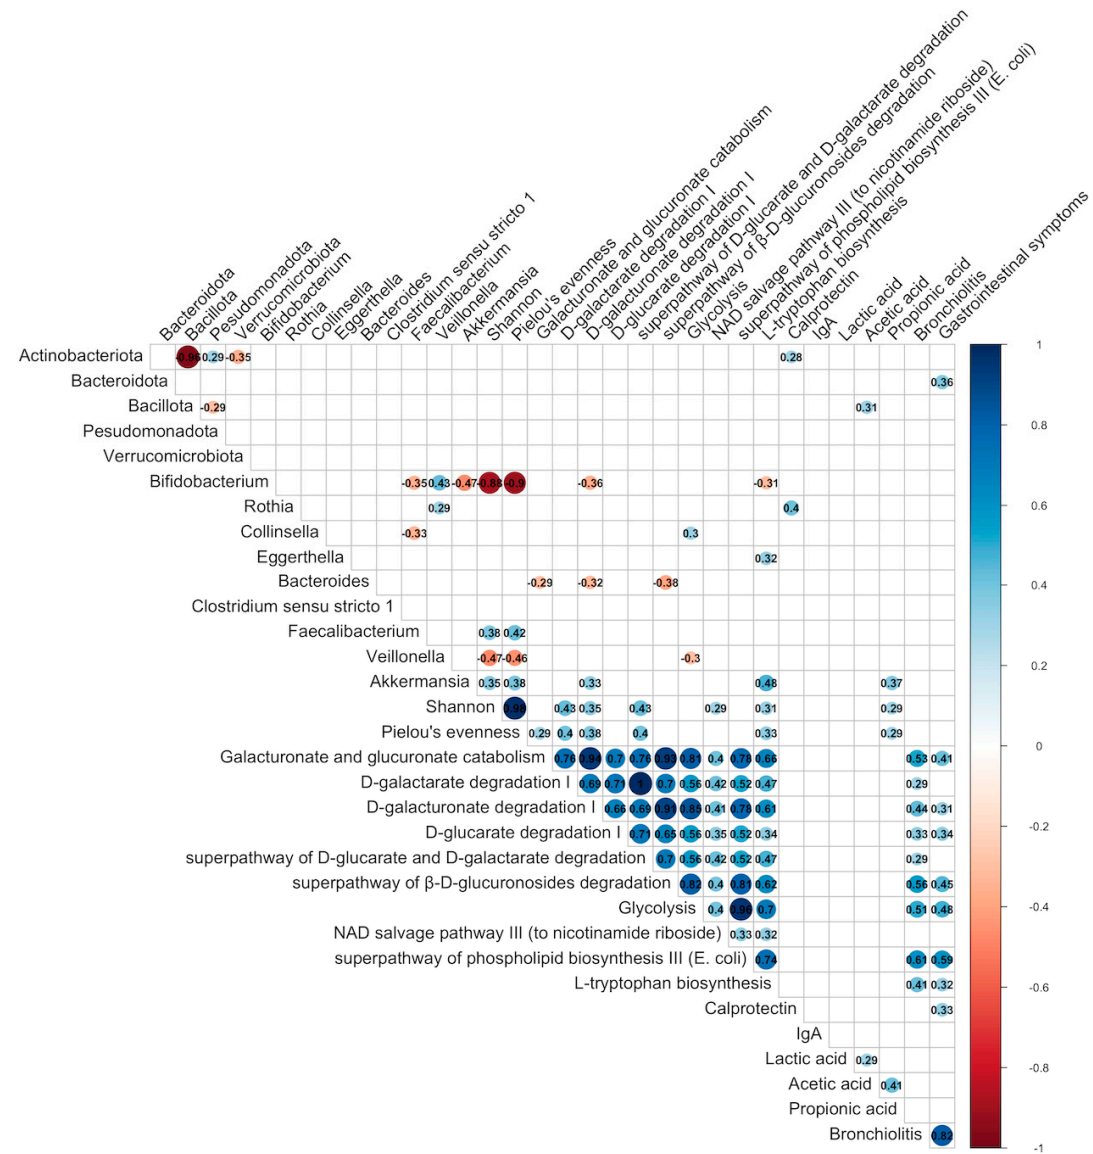

Supplement: s1 [file s1]
